# Supplementary material for: Declining, seasonal-varying emissions of sulfur hexafluoride from the United States
Source: Copernicus journal article supplement (doi:10.5194/acp-23-1437-2023), 2023-01-26
Supplement: Supplementary file 1 [file acp-23-1437-2023-supplement.pdf]

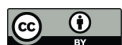

*Supplement of*

## **Declining, seasonal-varying emissions of sulfur hexafluoride from the United States**

**Lei Hu et al.**

*Correspondence to:* Lei Hu ([lei.hu@noaa.gov](mailto:lei.hu@noaa.gov))

The copyright of individual parts of the supplement might differ from the article licence.

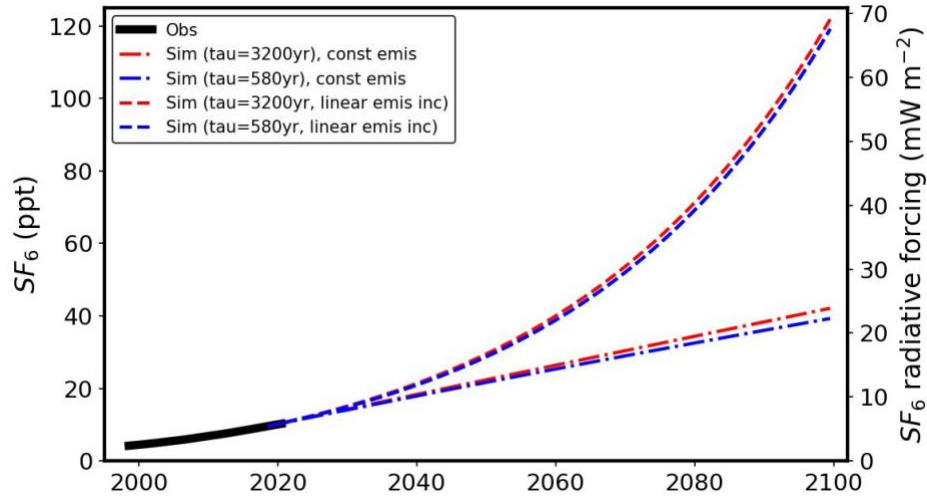

**Fig. S1.** Global atmospheric SF<sub>6</sub> mole fractions observed by NOAA for 1998 – 2021 and projected to 2100, considering two different atmospheric lifetimes (580 years and 3200 years) and two emission scenarios (a constant global emission of 9 Gg yr<sup>-1</sup> “const emis” and a constant emission increase of 0.2 (Gg yr<sup>-1</sup>) yr<sup>-1</sup> with an initial global emission of 9 Gg yr<sup>-1</sup> in 2018 “linear emis inc”). The corresponding radiative forcing is plotted on the right.

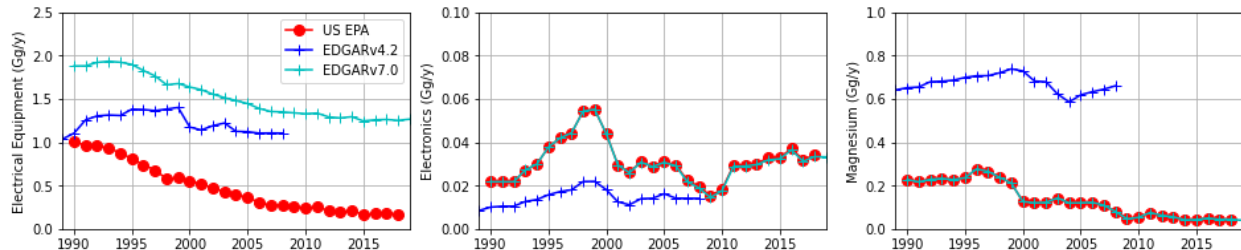

**Fig. S2.** National total sector emissions reported by the U.S. EPA national greenhouse gas inventory, EDGAR version 4.2 (EDGARv4.2) and EDGAR version 7.0 (EDGARv7.0) for electrical power transformation and distribution, electronics industries, and magnesium production.

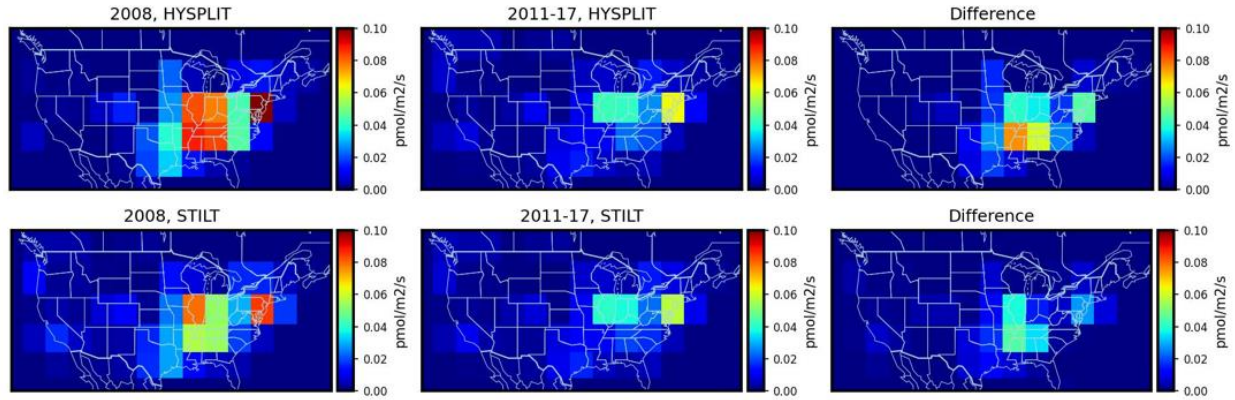

**Fig. S3.** Emission maps of SF<sub>6</sub> derived from atmospheric observations using two transport models (HYSPLIT-NAMS in upper panels and WRF-STILT in lower panels) for 2008 and 2011- 2017 periods. The third columns indicate emission differences between both periods.

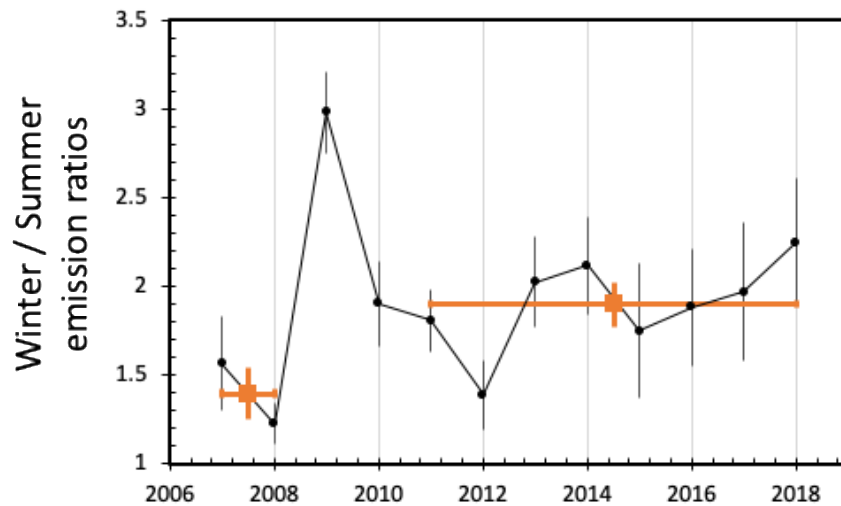

**Fig. S4.** The winter-to-summer ratios of U.S. national SF<sub>6</sub> emissions between winter (Nov - Feb) and summer (May - Aug) by year, derived from the atmospheric observations. Errorbars represent one standard deviation derived from 12 ensemble members. Orange squares indicate multi-year average ratios with vertical bars indicating one standard error. Horizontal lines indicate years represented.
